# Supplementary material for: CsFTL3, a chrysanthemum FLOWERING LOCUS T-like gene, is a key regulator of photoperiodic flowering in chrysanthemums
Source: PubMed Central journal article supplement — J Exp Bot. 2011 Dec 3;63(3):1461–77. doi: 10.1093/jxb/err387 (PMC3276106; doi:10.1093/jxb/err387), 2011-12-03
Supplement: supp_err387_00067256-file001.pdf [file supp_err387_00067256-file001.pdf]

**Title**

*CsFTL3*, a chrysanthemum *FLOWERING LOCUS T-like* gene, is a key regulator of photoperiodic flowering in chrysanthemums

**Running title**

*CsFTL3* induces flowering in chrysanthemums

**Authors**

Atsushi Oda<sup>1</sup>, Takako Narumi<sup>2</sup>, Tuoping Li<sup>1,3</sup>, Takumi Kando<sup>1,4</sup>, Yohei Higuchi<sup>1</sup>, Katsuhiko Sumitomo<sup>1</sup>, Seiichi Fukai<sup>2</sup> and Tamotsu Hisamatsu<sup>1,\*</sup>

<sup>1</sup>*National Institute of Floricultural Science (NIFS), National Agriculture and Food Research Organization (NARO), 2-1 Fujimoto, Tsukuba, Ibaraki 305-8519, Japan*

<sup>2</sup>*Graduate School of Agriculture, Kagawa University, 2393 Ikenobe, Miki-cho, Kita-gun, Kagawa 761-0795, Japan*

<sup>3</sup>*Present address: Liaoning University, Shenyang, Liaoning 110036, China*

<sup>4</sup>*Present address: Shimane Agricultural Technology Center, 2440 Ashiwata, Izumo, Shimane 693-0035, Japan*

|        |     |            |            |            |            |            |            |     |
|--------|-----|------------|------------|------------|------------|------------|------------|-----|
| CsFTL1 | --- | MPR-ERD    | PLVRGRVIGD | VLDSFTKSIN | LSVSYDDTEV | SNGRDLKPSQ | VVNQPRVGIG | 56  |
| CsFTL2 | --- | MPR-ERD    | PLVGGRVIGD | VLDSFTKSIN | LSVSYDDTEV | SNGCDLKPSQ | IVNQPRVGIG | 56  |
| CsFTL3 | --- | MPR-ERD    | PLVVGRVIGD | VLDSFTKSIN | LSVSYNDREV | ANGCELKPSK | VVNQPRVDIG | 56  |
| FT     | --- | MSINIRD    | PLIVSRVVGD | VLDPFNRSIT | LKVTYGQREV | TNGLDLRPSQ | VQNKPRVEIG | 57  |
| TFL1   |     | MENMGTRVIE | PLIMGRVVGD | VLDFFTPTTK | MNVSYNKKQV | SNGHELFPSS | VSSKPRVEIH | 60  |
| <hr/>  |     |            |            |            |            |            |            |     |
| CsFTL1 |     | GDDLRTFHTL | VMVDPDAPSP | SDPNLREYLH | WLVTDIPETT | GAQFGQEIVC | YESPRPTIGI | 116 |
| CsFTL2 |     | GDDLRAFHTL | VMVDPDAPSP | SDPNLREYLH | WLVTDIPGTT | GAQFGQEIVC | YESPRPTIGI | 116 |
| CsFTL3 |     | GDDMRAFHTL | VMVDPDAPSP | SDPNLREYLH | WLVTDIPATT | GAQFGQEIVC | YESPRPSMGI | 116 |
| FT     |     | GEDLRNFYTL | VMVDPDVPSP | SNPHLREYLH | WLVTDIPATT | GTTFGNEIVC | YENPSPTAGI | 117 |
| TFL1   |     | GGDLRSFFTL | VMIDPDVPGP | SDPFLKEHLH | WIVTNIPGTT | DATFGKEVVS | YELPRPSIGI | 120 |
| <hr/>  |     |            |            |            |            |            |            |     |
|        |     |            |            | ▲          |            |            |            |     |
| CsFTL1 |     | HRMVFVLFHQ | LGRKTVYAPA | -WRQNFNTKN | FAELYNLGSP | VAAVYFNCQR | ESRFGGRRR  | 174 |
| CsFTL2 |     | HRMVYVLFHQ | LGRQTAYAPG | -WRQNFNTKN | FAELYNLGSP | VAAVYFNCQR | ESGFGRRRR  | 174 |
| CsFTL3 |     | HRMVFVLFHQ | LGRQTVYAPG | -WRQNFNTKD | FAELYNLGSP | VAAVYFNCQR | ESGFGGRRR  | 174 |
| FT     |     | HRVVFILFRQ | LGRQTVYAPG | -WRQNFNTRE | FAEIYNLGLP | VAAVFYNCQR | ESGCGGRRR  | 175 |
| TFL1   |     | HRFVFVLFHQ | KQRRVIFPNI | PSRDHFNTRK | FAVEYDLGLP | VAAVFFNAQR | ET--AARKR  | 177 |
| <hr/>  |     |            |            |            |            |            |            |     |
|        |     |            |            | ▲          |            |            |            |     |

**Figure S1.** Comparison of deduced amino acid sequences of CsFTL1, CsFTL2, CsFTL3, FT, and TFL1. Identical residues of at least three residues are framed. The PEBP domain boundaries are marked by underlines. Arrow heads indicate the key amino acid residue contributing to FT and TFL functioning ([Hanzawa et al., 2005](#)).

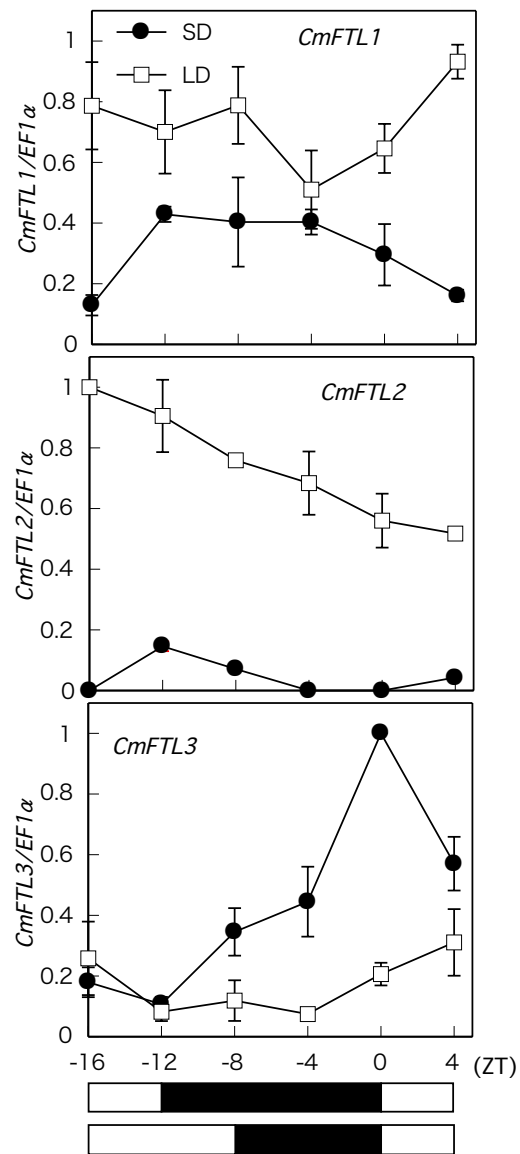

**Figure S2.** Expression of *CsFTL* family genes in leaves of chrysanthemum Reagan under SD and LD conditions.

The plants were grown under LD (16-h) conditions and transferred to SD (12-h; closed circle) conditions or kept in LD (opened circle) conditions. A week after transfer, leaves were harvested every 4 h and subjected to QRT-PCR analysis.

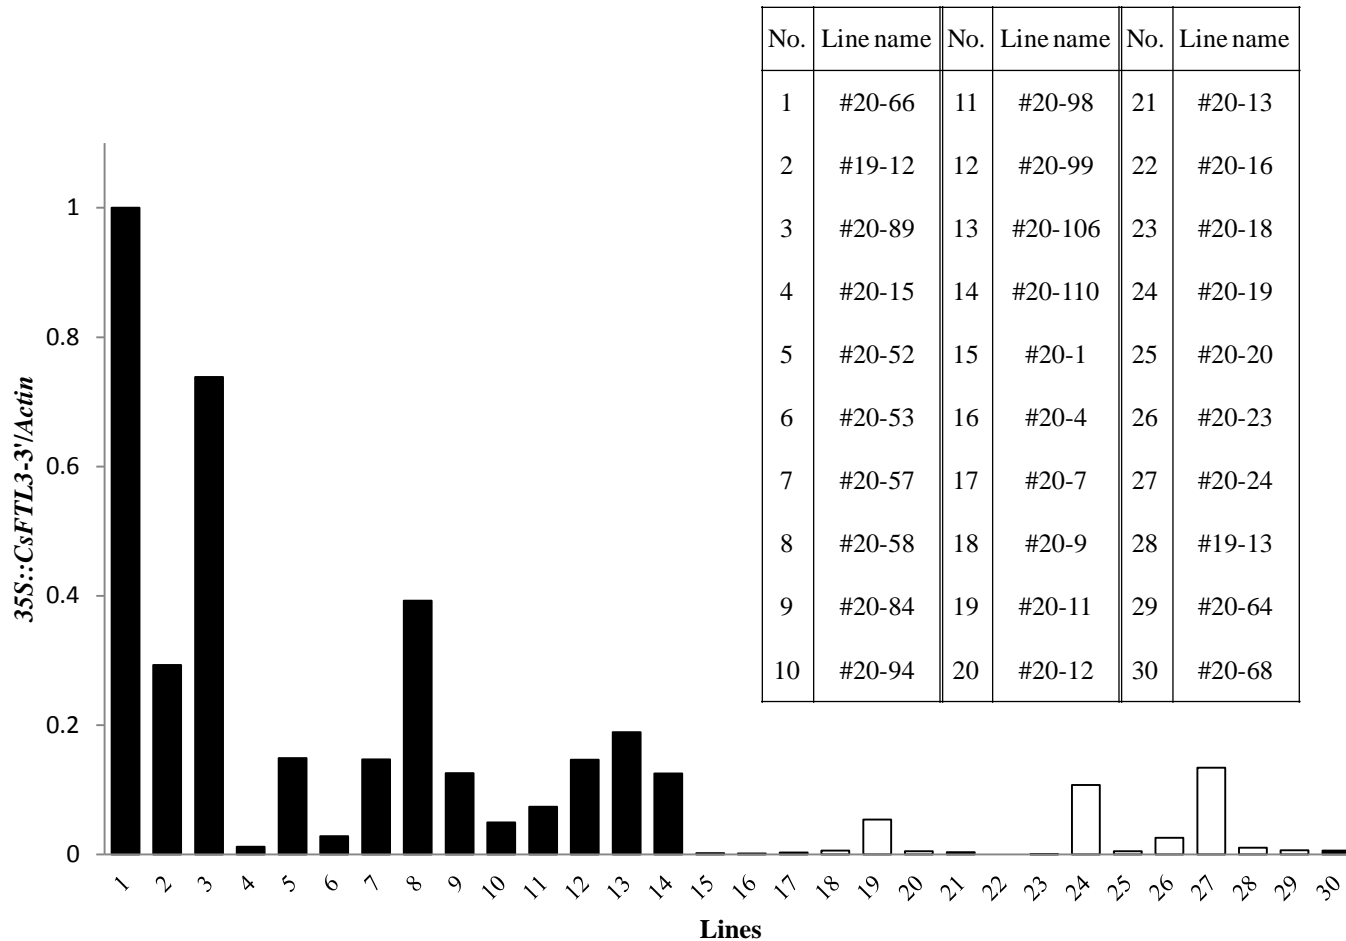

**Figure S3.** Relative expression levels of exogenous *CsFTL3* mRNA in *in vitro* transgenic (35S::*CsFTL3*) chrysanthemum Jimba plants.

The plants of 14 transgenic lines had flower buds (black), whereas the plants of the other 16 lines (white) had no flower buds under *in vitro* conditions.

**A**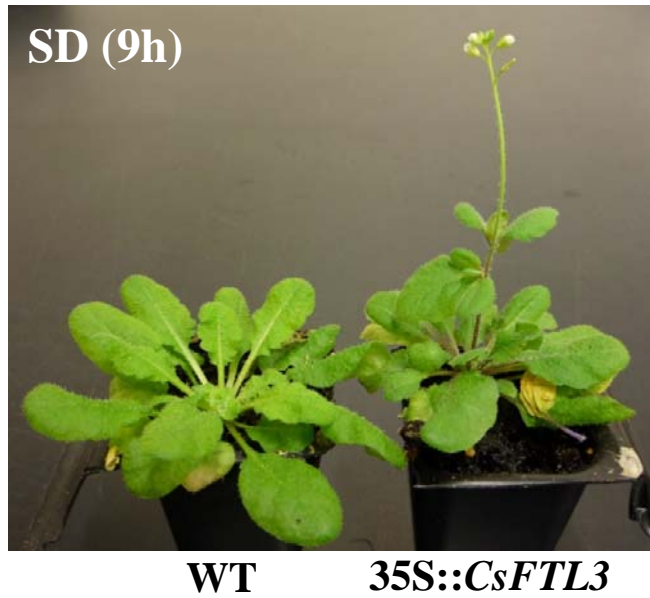**B**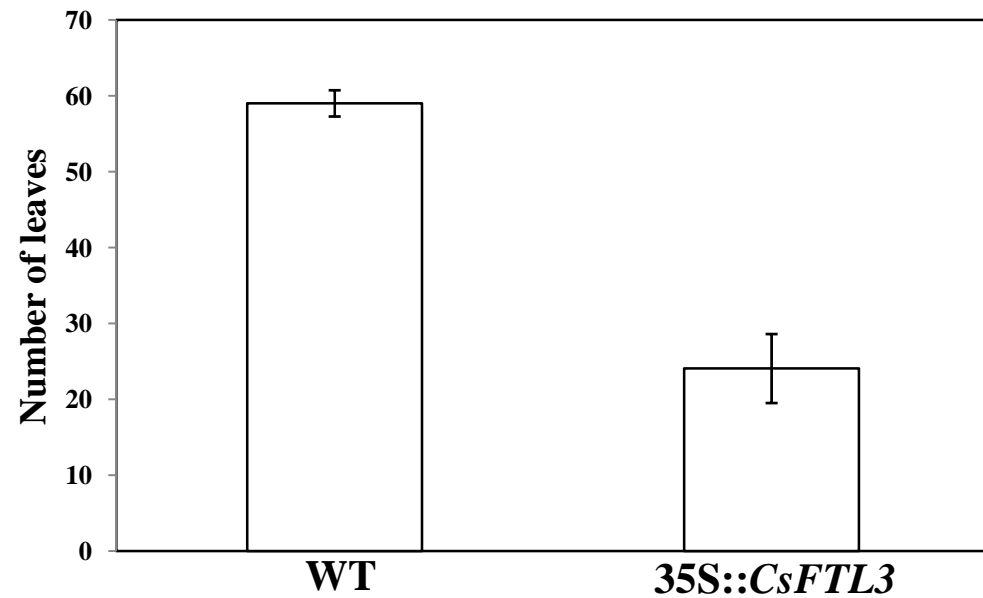

**Figure S4** The effect of *CsFTL3* overexpression on flowering in *Arabidopsis* under SD conditions.  
(A) Early flowering phenotype of *CsFTL3-ox Arabidopsis* plants under SD conditions.  
(B) Total number of leaves at flowering in the T<sub>3</sub> population.

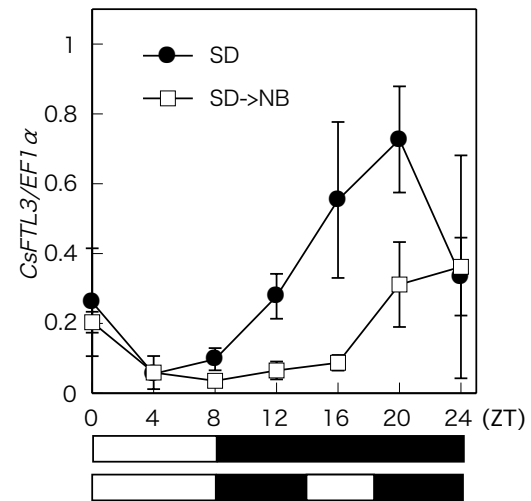

Figure S5. Transfer from SD to NB conditions down-regulates the expression of *CsFTL3* in *C. seticuspe*.

The plants exposed to four 8-h SD cycles were moved to NB conditions (SD plus 4-h NB; opened circle) or kept under SD (closed circle). Transcription levels were monitored from the beginning of second NB cycles over the subsequent 24 h. Leaves were harvested every 4 h and subjected to QRT-PCR analysis. The values were normalised by *CsEF1α*.

**Table S1.** Primers sequences and PCR conditions used in the study

| Gene                            | Forward primer         | Reverse primer         | Detection temperature (°C) | PCR conditions |
|---------------------------------|------------------------|------------------------|----------------------------|----------------|
| <i>CsFTL1</i>                   | AATCGTGTGCTATGAGAGCC   | GCTTGTAACGTCCTCTTCATGC | 82                         | A              |
| <i>CsFTL2</i>                   | GAAAGCACGCATATCATAAC   | CATCGATCAAACACGTACAGTA | 72                         | B              |
| <i>CsFTL3</i>                   | GGGAAAGTGGATTTGGTGGACG | GTCTTACAATTTGGTACTGTCG | 77                         | C              |
| <i>FTL3</i>                     | TCCAAGTCCTAGTGACCCTAAC | TATCGGTAACCAACCAGTGT   | 72                         | B              |
| <i>CsFTL3</i> transgene 3'      | GGGAAAGTGGATTTGGTGGACG | AATTCGAGCTCTAAGCGCTG   | 72                         | B              |
| <i>CsFTL3</i> transgene 5'      | GTACAAAAAAGCAGGCTCC    | CTAGGACTTGGAGCATCAGG   | 72                         | B              |
| <i>CsAFL1</i>                   | CAAGCTCAACCATCAATAGTC  | TGCAGCACATGAACGAGTAG   | 72                         | B              |
| <i>CsFL</i>                     | CATTGATGCCATATTTAACTC  | ACACGGATCATTTCATTGTATA | 72                         | B              |
| <i>CsM111</i>                   | GGTCTCAAGAATATTCGCAC   | TCATTAGTCATCCCATCAGC   | 72                         | B              |
| <i>CsACTIN</i>                  | GATGACGCAGATCATGTTCG   | AGCATGTGGAAGTGCATACC   | 72                         | B              |
| <i>CsEF1<math>\alpha</math></i> | CTTGTTGCTTGATGACTGTGG  | ACCATTCAAGCGACAGACTC   | 72                         | B              |

A) PCR was performed with an initial denaturing step at 95 °C for 20 s, followed by 40 cycles at 95 °C for 5 s, 60 °C for 20 s, 72 °C for 15 s, and 82 °C for 2 s. Fluorescence was quantified after the incubation at 82 °C.

B) PCR was performed with an initial denaturing step at 95 °C for 20 s, followed by 40 cycles at 95 °C for 5 s, 60 °C for 20 s, 72 °C for 15 s. Fluorescence was quantified after the incubation at 72 °C.

C) PCR was performed with an initial denaturing step at 95 °C for 20 s, followed by 40 cycles at 95 °C for 5 s, 60 °C for 20 s, 72 °C for 15 s, and 77 °C for 2 s. Fluorescence was quantified after the incubation at 77 °C.

Table S2. The effect of de-foliation on the transition from vegetative to reproductive phase in grafting plants between wild type and 35S::*CsFTL3* transgenic plants

|        | De-foliation       |       | No  | Yes |
|--------|--------------------|-------|-----|-----|
|        | Stock              | Scion |     |     |
| Expt.1 | 35S:: <i>CsFTL</i> | WT    | 1/3 | 3/3 |
|        | WT                 | WT    | 0/4 | 0/5 |
| Expt.2 | 35S:: <i>CsFTL</i> | WT    | -   | 3/3 |
|        | WT                 | WT    | -   | 0/3 |

The values indicate 'number of plants with phase transition/total number of plants tested'.  
 Wild-type Jimba plants (for experiment 1) and Nagano-queen plants (for experiment 2) were used as scion, respectively.

Oda et al., Table S2.
